# Supplementary material for: (N-CnH2n–1)-1,3-Azapropanedithiolate (n = 5, 6, 7)-bridged diiron complexes as mimics for the active site of [FeFe]-hydrogenases: the influence of the bridge on the diiron complex
Source: Royal Society of Chemistry journal article supplement (doi:10.1039/b616236c), 2007-01-01
Supplement: b616236c.pdf [file b616236c.pdf]

## **(*N*-C<sub>n</sub>H<sub>2n-1</sub>)-1, 3-Azapropanedithiolate (n = 5, 6, 7) bridged diiron complexes as mimics for the active site of [FeFe]-hydrogenases: The influence of the bridge on diiron complex**

**Youtao Si, Chengbing Ma, Mingqiang Hu, Hui Chen, Changneng Chen\* and Qiutian Liu**

Table 1. Selected bond lengths [Å] and angles [°] in **1**

|             |            |                  |          |
|-------------|------------|------------------|----------|
| N(1)-C(9)   | 1.349(6)   | S(2)-Fe(1)-S(1)  | 84.28(4) |
| N(1)-C(7)   | 1.440(5)   | S(2)-Fe(1)-Fe(2) | 56.20(3) |
| N(1)-C(8)   | 1.441(5)   | S(1)-Fe(1)-Fe(2) | 56.16(3) |
| Fe(2)-S(2)  | 2.2512(10) | S(2)-Fe(2)-S(1)  | 84.54(3) |
| Fe(2)-S(1)  | 2.2523(10) | S(2)-Fe(2)-Fe(1) | 56.31(3) |
| S(2)-C(8)   | 1.833(4)   | S(1)-Fe(2)-Fe(1) | 56.48(3) |
| S(1)-C(7)   | 1.841(4)   | Fe(2)-S(2)-Fe(1) | 67.49(3) |
| Fe(1)-S(2)  | 2.2541(10) | C(9)-N(1)-C(7)   | 119.1(4) |
| Fe(1)-S(1)  | 2.2606(10) | C(9)-N(1)-C(8)   | 119.9(4) |
| Fe(1)-Fe(2) | 2.5025(7)  | C(7)-N(1)-C(8)   | 110.7(3) |

Table 2. Selected bond lengths [Å] and angles [°] in **2**

|             |            |                  |          |
|-------------|------------|------------------|----------|
| Fe(1)-S(1)  | 2.2441(15) | S(1)-Fe(1)-S(2)  | 84.70(5) |
| Fe(1)-S(2)  | 2.2528(14) | C(8)-N(1)-C(7)   | 112.7(5) |
| Fe(1)-Fe(2) | 2.5280(10) | C(8)-N(1)-C(9)   | 112.7(5) |
| Fe(2)-S(2)  | 2.2393(14) | C(7)-N(1)-C(9)   | 115.5(5) |
| Fe(2)-S(1)  | 2.2511(15) | S(2)-Fe(2)-S(1)  | 84.85(5) |
| N(1)-C(7)   | 1.448(8)   | S(2)-Fe(2)-Fe(1) | 56.00(4) |
| N(1)-C(9)   | 1.491(7)   | S(1)-Fe(2)-Fe(1) | 55.65(4) |
| S(2)-C(8)   | 1.823(6)   | Fe(1)-S(1)-Fe(2) | 68.44(4) |
| S(1)-C(7)   | 1.845(6)   | S(1)-Fe(1)-Fe(2) | 55.91(4) |
| N(1)-C(8)   | 1.434(8)   | S(2)-Fe(1)-Fe(2) | 55.50(4) |

Table 3. Selected bond lengths [Å] and angles [°] in **3**

|                 |           |                  |            |
|-----------------|-----------|------------------|------------|
| Fe(1)-S(2)      | 2.2495(8) | S(2)-Fe(1)-Fe(2) | 56.21(2)   |
| Fe(1)-S(1)      | 2.2569(8) | S(1)-Fe(1)-Fe(2) | 56.18(2)   |
| Fe(1)-Fe(2)     | 2.5103(7) | S(2)-Fe(2)-S(1)  | 84.67(3)   |
| N(1)-C(7)       | 1.435(3)  | S(2)-Fe(2)-Fe(1) | 56.04(2)   |
| N(1)-C(8)       | 1.438(3)  | S(1)-Fe(2)-Fe(1) | 56.22(2)   |
| S(2)-C(8)       | 1.840(3)  | Fe(1)-S(2)-Fe(2) | 67.75(2)   |
| S(1)-C(7)       | 1.840(2)  | Fe(2)-S(1)-Fe(1) | 67.60(2)   |
| Fe(2)-S(2)      | 2.2542(8) | C(7)-N(1)-C(8)   | 111.1(2)   |
| Fe(2)-S(1)      | 2.2558(8) | C(7)-N(1)-C(9)   | 113.63(18) |
| S(2)-Fe(1)-S(1) | 84.75(3)  | C(8)-N(1)-C(9)   | 117.34(19) |

Table 4. Selected bond lengths [Å] and angles [°] in **4**

|                 |            |                  |           |
|-----------------|------------|------------------|-----------|
| C(11)-N(1)      | 1.449(10)  | P(1)-Fe(1)-Fe(2) | 153.52(8) |
| Fe(2)-P(2)      | 2.229(2)   | S(2)-Fe(1)-Fe(2) | 55.88(5)  |
| Fe(2)-S(2)      | 2.2560(19) | S(1)-Fe(1)-Fe(2) | 55.96(5)  |
| Fe(2)-S(1)      | 2.262(2)   | P(2)-Fe(2)-S(2)  | 92.78(8)  |
| C(12)-S(1)      | 1.846(8)   | P(2)-Fe(2)-S(1)  | 158.37(8) |
| S(2)-C(11)      | 1.826(7)   | S(2)-Fe(2)-S(1)  | 83.99(7)  |
| N(1)-C(13)      | 1.477(9)   | P(2)-Fe(2)-Fe(1) | 104.48(7) |
| Fe(1)-P(1)      | 2.224(2)   | C(12)-N(1)-C(11) | 111.4(6)  |
| Fe(1)-S(2)      | 2.260(2)   | C(12)-N(1)-C(13) | 113.7(6)  |
| Fe(1)-S(1)      | 2.270(2)   | C(11)-N(1)-C(13) | 111.9(6)  |
| Fe(1)-Fe(2)     | 2.5279(13) | Fe(2)-S(2)-Fe(1) | 68.08(6)  |
| P(1)-Fe(1)-S(1) | 102.20(8)  | S(2)-Fe(2)-Fe(1) | 56.04(6)  |
| S(2)-Fe(1)-S(1) | 83.72(7)   | S(1)-Fe(2)-Fe(1) | 56.25(6)  |

Table 5. Selected bond lengths [Å] and angles [°] in **5**

|                 |            |                  |           |
|-----------------|------------|------------------|-----------|
| Fe(1)-P(1)      | 2.2276(12) | S(2)-Fe(1)-S(1)  | 84.42(4)  |
| Fe(1)-S(2)      | 2.2410(11) | P(1)-Fe(1)-Fe(2) | 113.97(4) |
| Fe(1)-S(1)      | 2.2536(11) | S(2)-Fe(1)-Fe(2) | 54.30(3)  |
| Fe(1)-Fe(2)     | 2.6374(8)  | S(1)-Fe(1)-Fe(2) | 53.64(3)  |
| Fe(2)-P(2)      | 2.2329(12) | P(2)-Fe(2)-S(1)  | 87.31(4)  |
| Fe(2)-S(1)      | 2.2334(11) | P(2)-Fe(2)-S(2)  | 169.32(4) |
| Fe(2)-S(2)      | 2.2540(11) | S(1)-Fe(2)-S(2)  | 84.59(4)  |
| S(1)-C(12)      | 1.830(4)   | P(2)-Fe(2)-Fe(1) | 115.57(4) |
| S(2)-C(11)      | 1.834(4)   | S(1)-Fe(2)-Fe(1) | 54.36(3)  |
| N(1)-C(12)      | 1.443(4)   | S(2)-Fe(2)-Fe(1) | 53.84(3)  |
| N(1)-C(11)      | 1.447(4)   | Fe(1)-S(2)-Fe(2) | 71.85(3)  |
| N(1)-C(13)      | 1.485(4)   | C(12)-N(1)-C(11) | 112.7(3)  |
| P(1)-Fe(1)-S(2) | 88.58(4)   | C(12)-N(1)-C(13) | 113.5(3)  |
| P(1)-Fe(1)-S(1) | 167.53(4)  | C(11)-N(1)-C(13) | 111.6(3)  |

Table 6. Selected bond lengths [Å] and angles [°] in **6**

|             |           |                  |            |
|-------------|-----------|------------------|------------|
| Fe(2)-P(2)  | 2.2218(8) | P(1)-Fe(1)-S(1)  | 88.17(3)   |
| Fe(2)-Fe(1) | 2.612     | P(1)-Fe(1)-S(2)  | 164.09(3)  |
| Fe(2)-S(2)  | 2.2495(6) | S(1)-Fe(1)-S(2)  | 84.36(2)   |
| N(1)-C(12)  | 1.443(3)  | P(2)-Fe(2)-S(1)  | 164.28(3)  |
| N(1)-C(11)  | 1.449(3)  | P(2)-Fe(2)-S(2)  | 91.03(3)   |
| N(1)-C(13)  | 1.490(3)  | S(1)-Fe(2)-S(2)  | 84.27(2)   |
| S(2)-C(12)  | 1.840(2)  | Fe(1)-S(2)-Fe(2) | 71.01(2)   |
| S(1)-C(11)  | 1.833(2)  | Fe(1)-S(1)-Fe(2) | 71.11(2)   |
| Fe(1)-P(1)  | 2.2259(8) | C(12)-N(1)-C(11) | 112.27(19) |
| Fe(1)-S(1)  | 2.2447(6) | C(12)-N(1)-C(13) | 114.50(19) |
| Fe(1)-S(2)  | 2.2476(7) | C(11)-N(1)-C(13) | 112.36(18) |
